# Supplementary material for: Long-term study of the efficacy and safety of OnabotulinumtoxinA for the prevention of chronic migraine: COMPEL study
Source: Springer Nature journal article supplement (doi:10.1186/s10194-018-0840-8), 2018-02-05
Supplement: MOESM1 [file 15442750]

**Figure S1.** Long-term effect of onabotulinum toxinA on A) number of headache days per 28-d period, B) change in number of headache days vs baseline, C) HIT-6 score, and D) change in HIT-6 score vs baseline, depicting outcomes after 5 (wk 60) and 9 (wk 180) treatments, by race group.

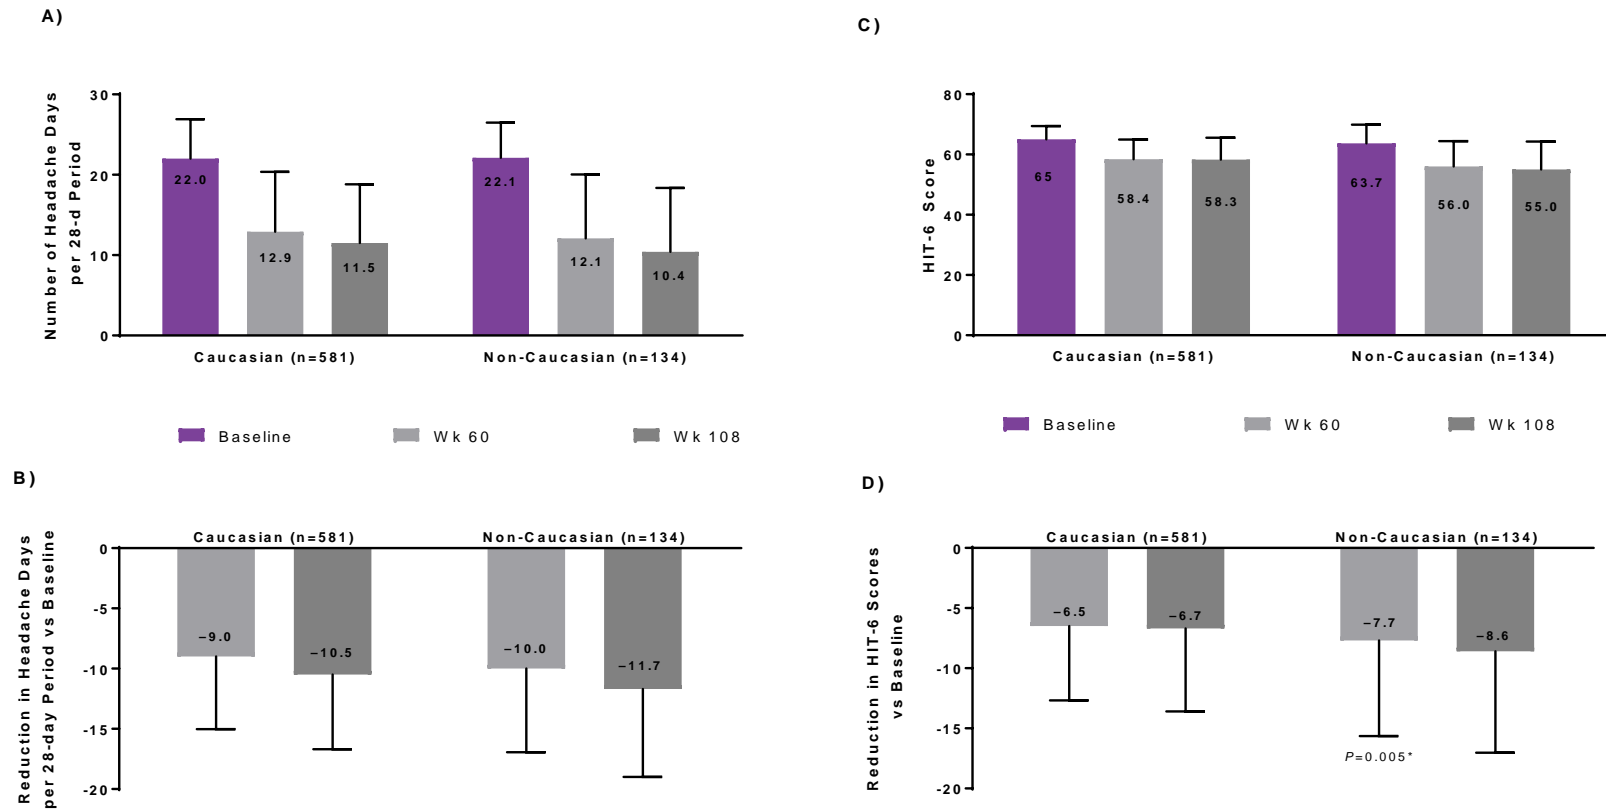

HIT-6=6-item Headache Impact Test.

\*2-sided *P* value for comparing between subgroups is from the 2 independent groups *t*-tests.

**Figure S2.** Long-term effect of onabotulinumtoxinA on A) number of headache days per 28-d period, B) change in number of headache days vs baseline, C) HIT-6 score, and D) change in HIT-6 score vs baseline, depicting outcomes after 5 (wk 60) and 9 (wk 180) treatments, by comorbid anxiety group.

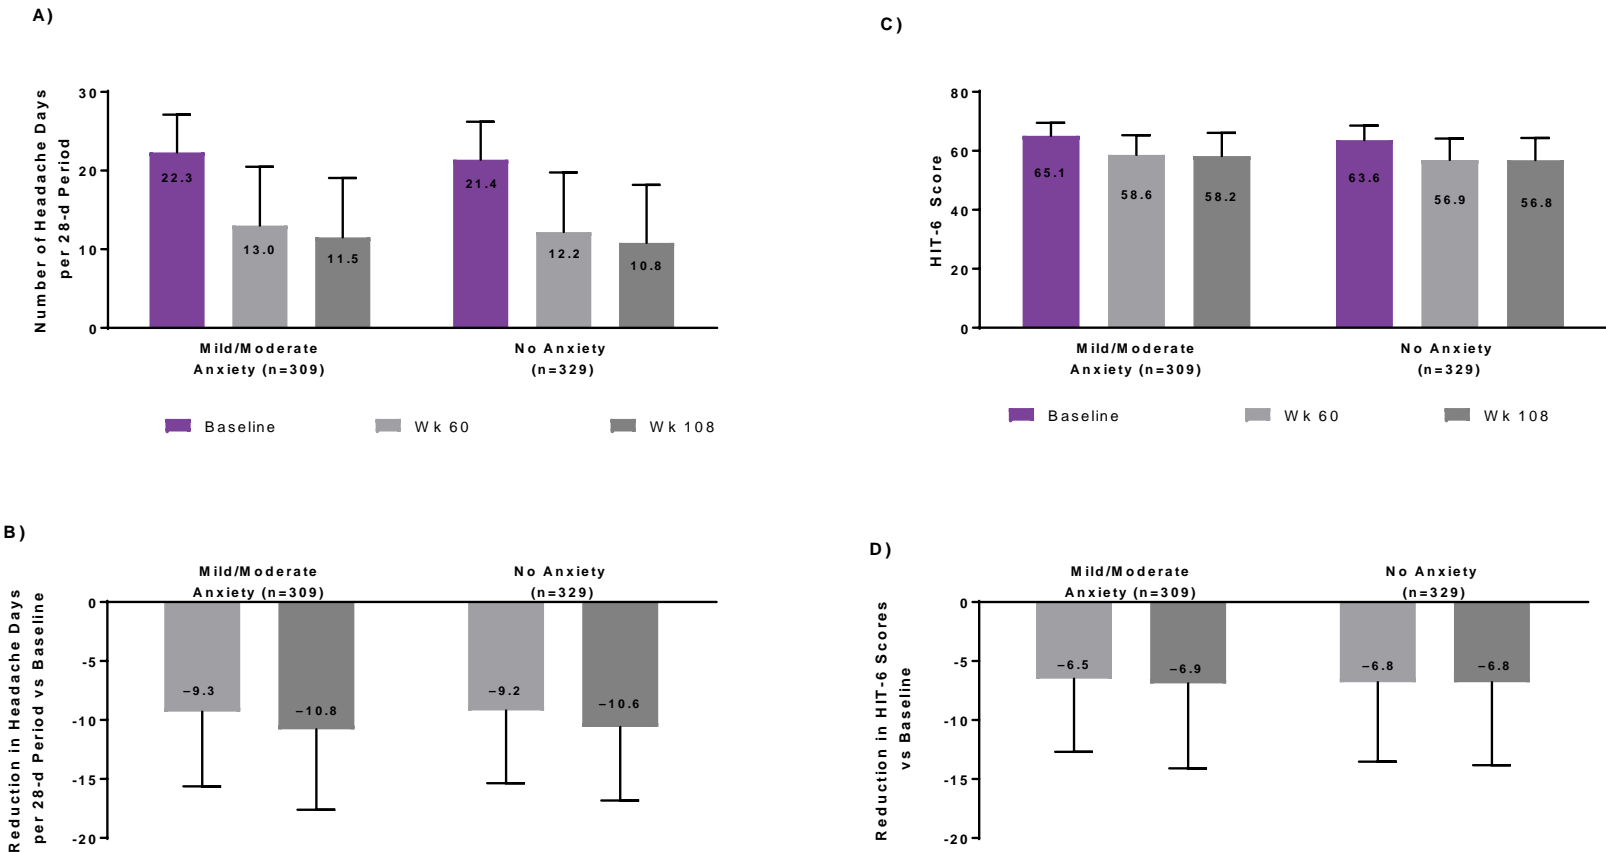

HIT-6=6-item Headache Impact Test.

**Figure S3.** Long-term effect of onabotulinumtoxinA on A) number of headache days per 28-d period, B) change in number of headache days vs baseline, C) HIT-6 score, and D) change in HIT-6 score vs baseline, depicting outcomes after 5 (wk 60) and 9 (wk 108) treatments, by comorbid depression group.

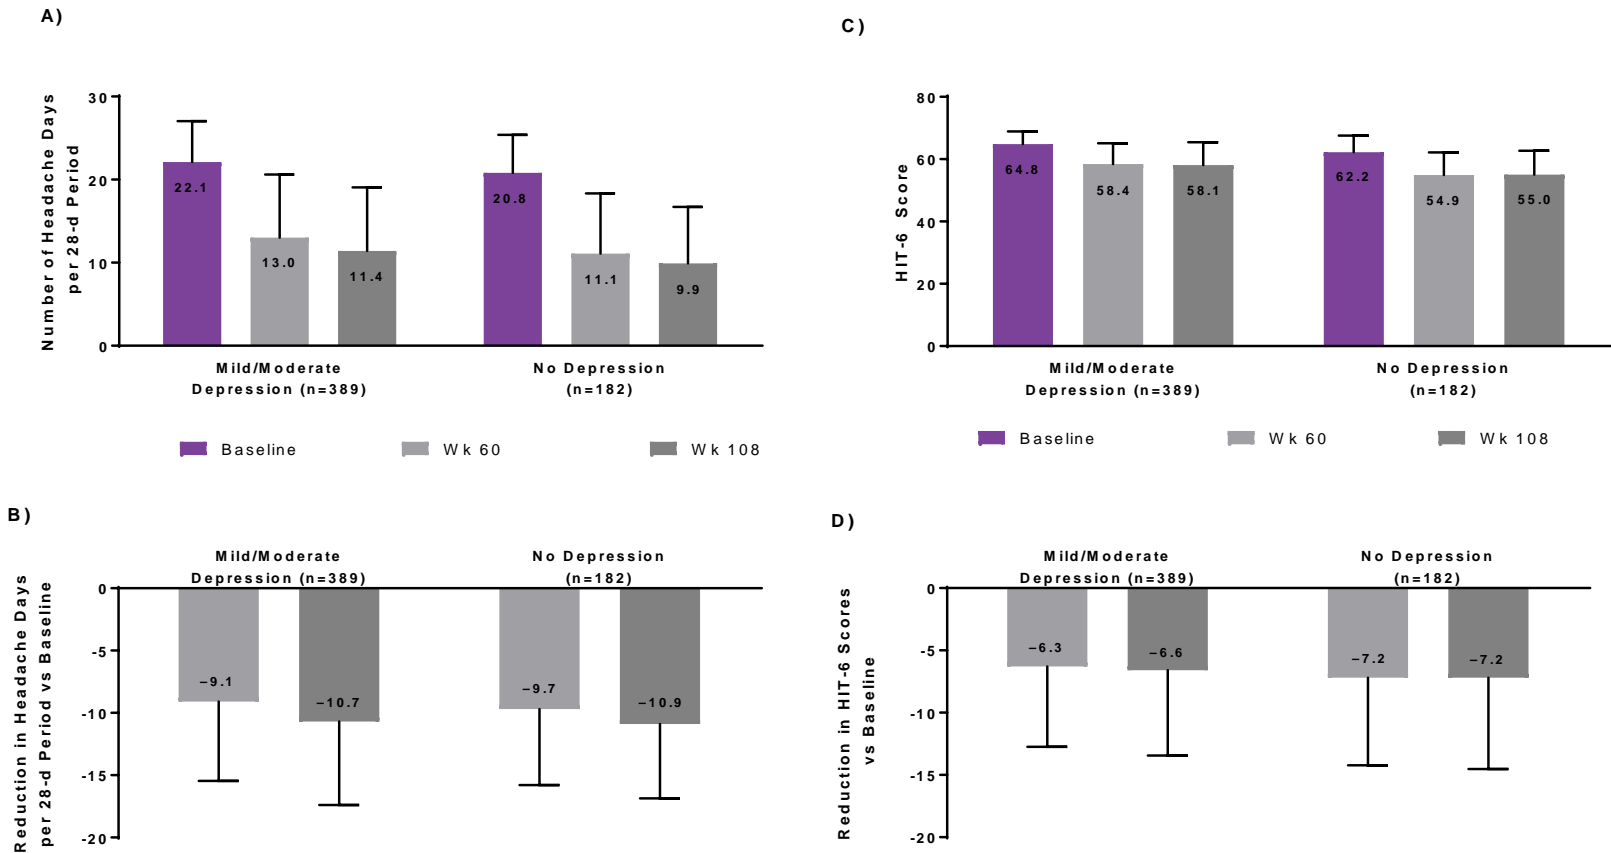

HIT-6=6-item Headache Impact Test.

**Figure S4.** Long-term effect of onabotulinumtoxinA on A) number of headache days per 28-d period, B) change in number of headache days vs baseline, C) HIT-6 score, and D) change in HIT-6 score vs baseline, depicting outcomes after 5 (wk 60) and 9 (wk 180) treatments, by BMI.

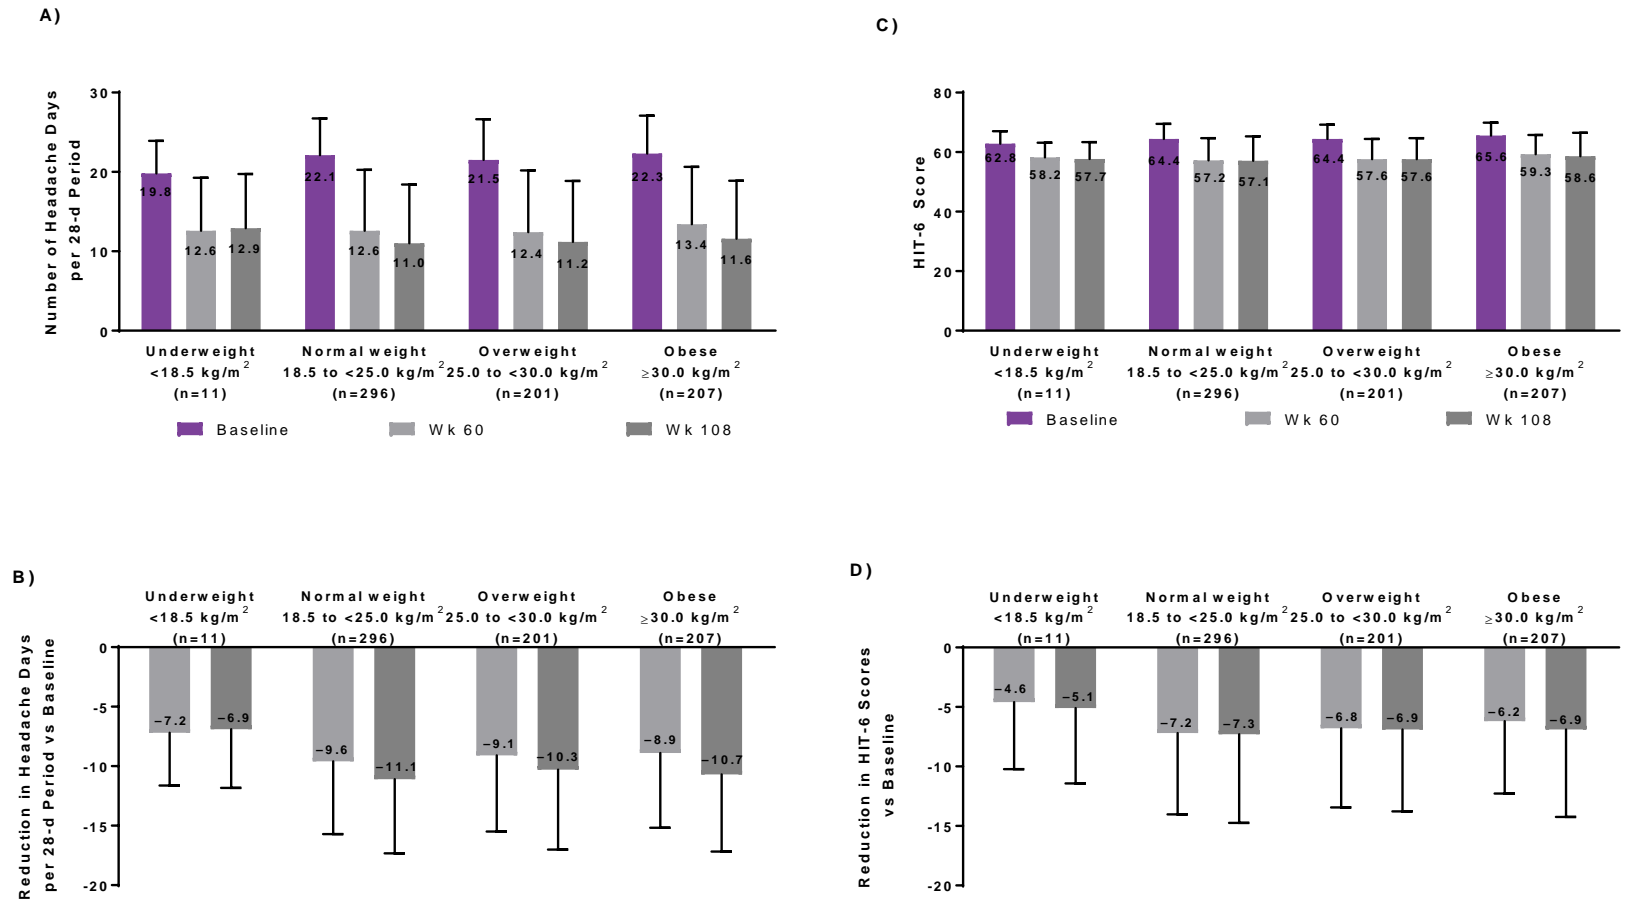

BMI=body mass index; HIT-6=6-item Headache Impact Test.

**Figure S5.** Long-term effect of onabotulinumtoxinA on A) number of headache days per 28-d period, B) change in number of headache days vs baseline, C) HIT-6 score, and D) change in HIT-6 score vs baseline, depicting outcomes after 5 (wk 60) and 9 (wk 108) treatments, by history of acute medication overuse at baseline.

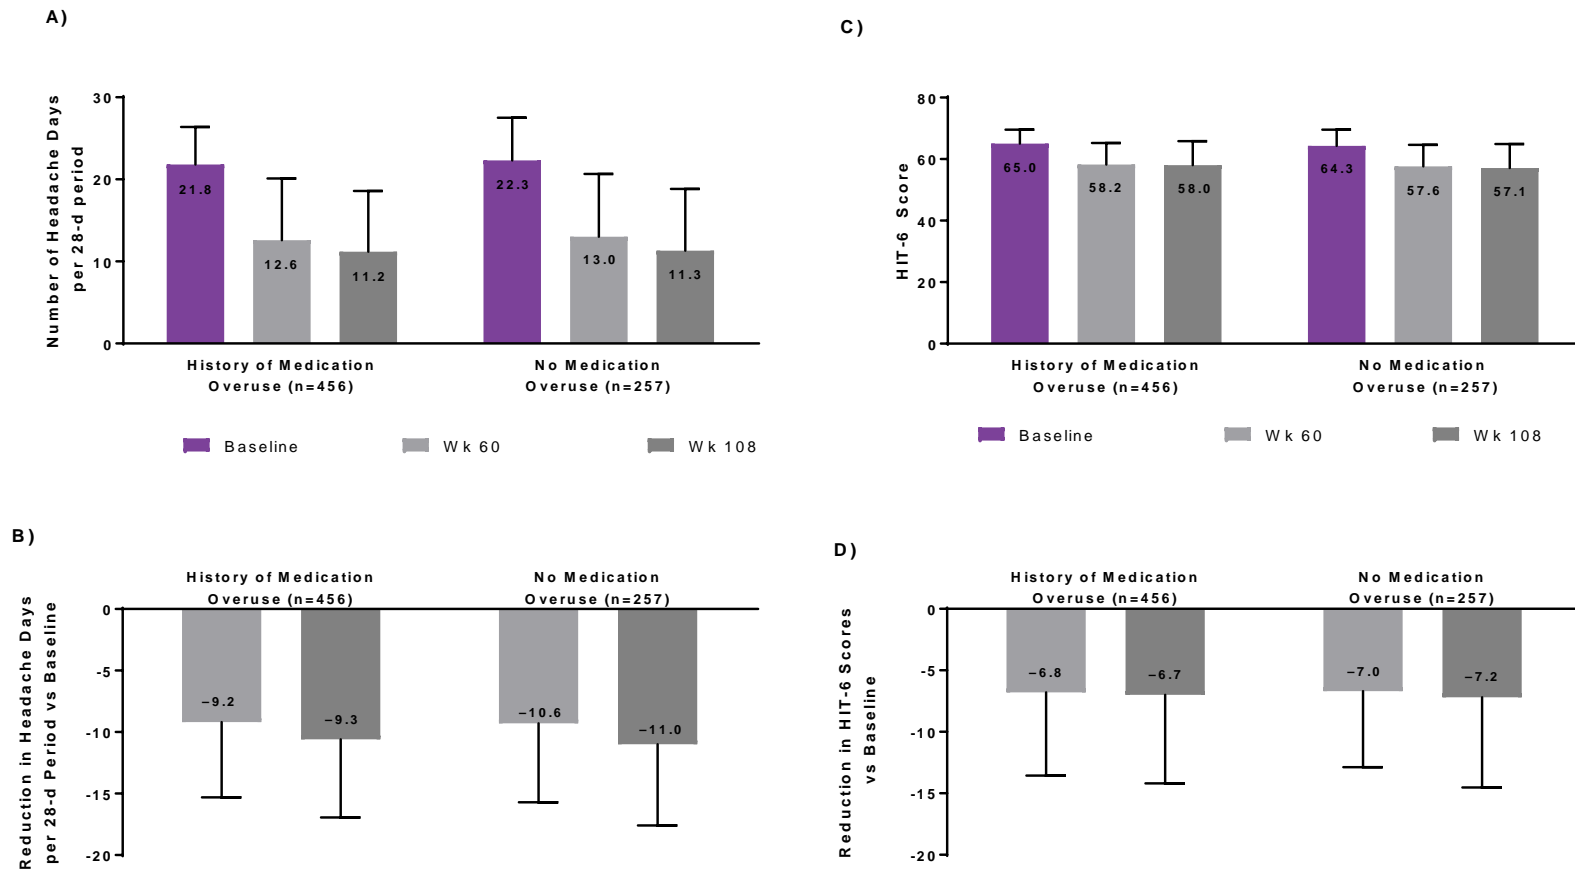

HIT-6=6-item Headache Impact Test.

\*2-sided *P* value for comparing between subgroups is from the 2 independent groups *t*-tests.

**Figure S6.** Long-term effect of onabotulinumtoxinA on A) number of headache days per 28-d period, B) change in number of headache days vs baseline, C) HIT-6 score, and D) change in HIT-6 score vs baseline, depicting outcomes after 5 (wk 60) and 9 (wk 180) treatments, by age.

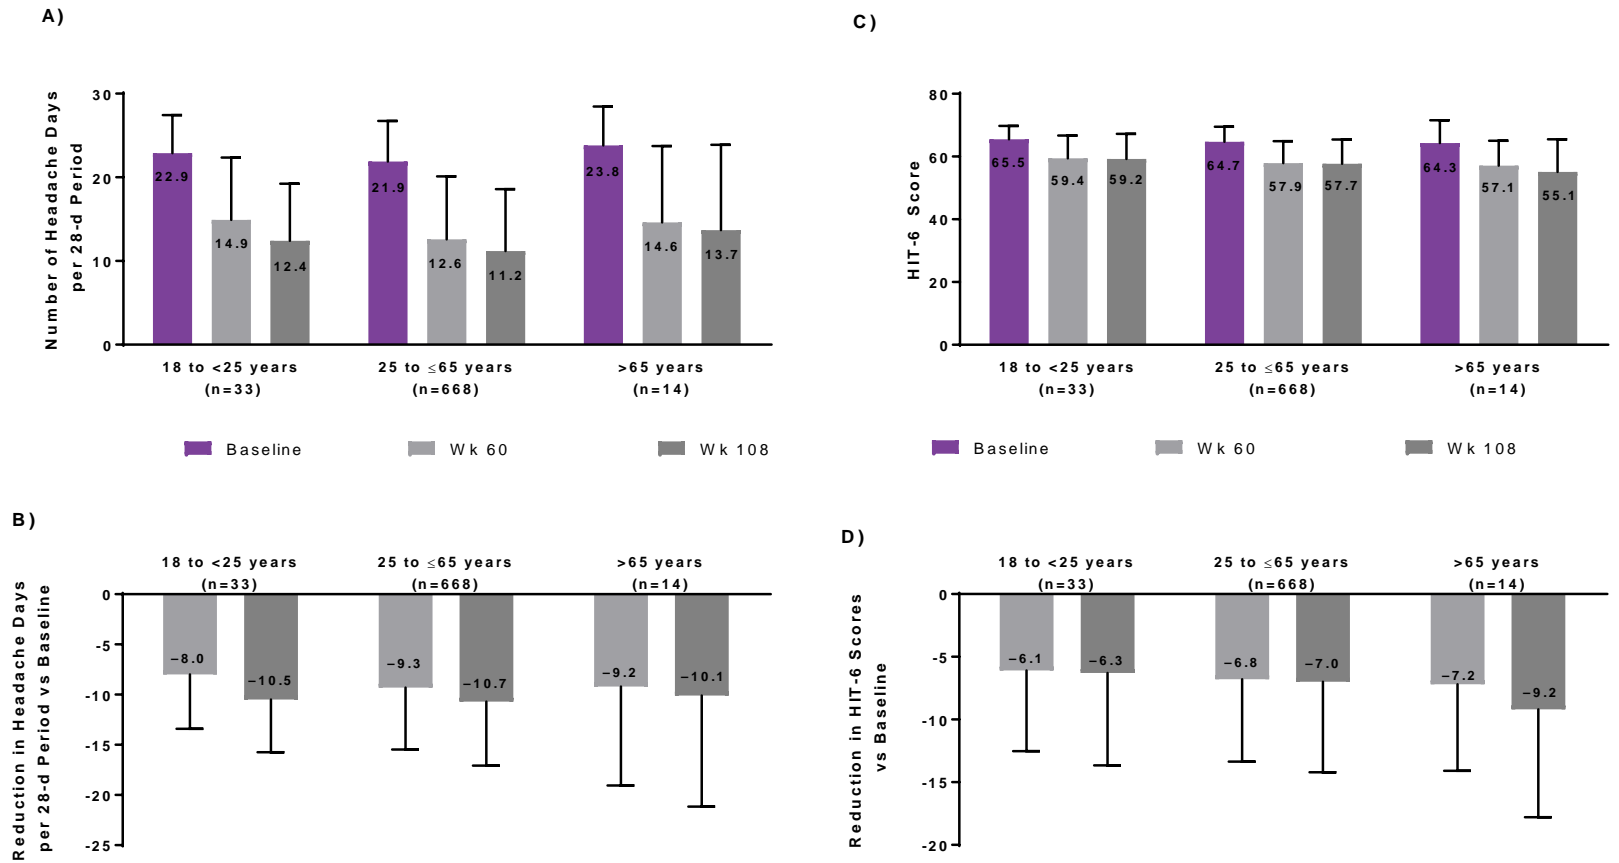

HIT-6=6-item Headache Impact Test.

**Figure S7.** Long-term effect of onabotulinumtoxinA on A) number of headache days per 28-d period, B) change in number of headache days vs baseline, C) HIT-6 score, and D) change in HIT-6 score vs baseline, depicting outcomes after 5 (wk 60) and 9 (wk 108) treatments, by use of oral preventive treatment at baseline.

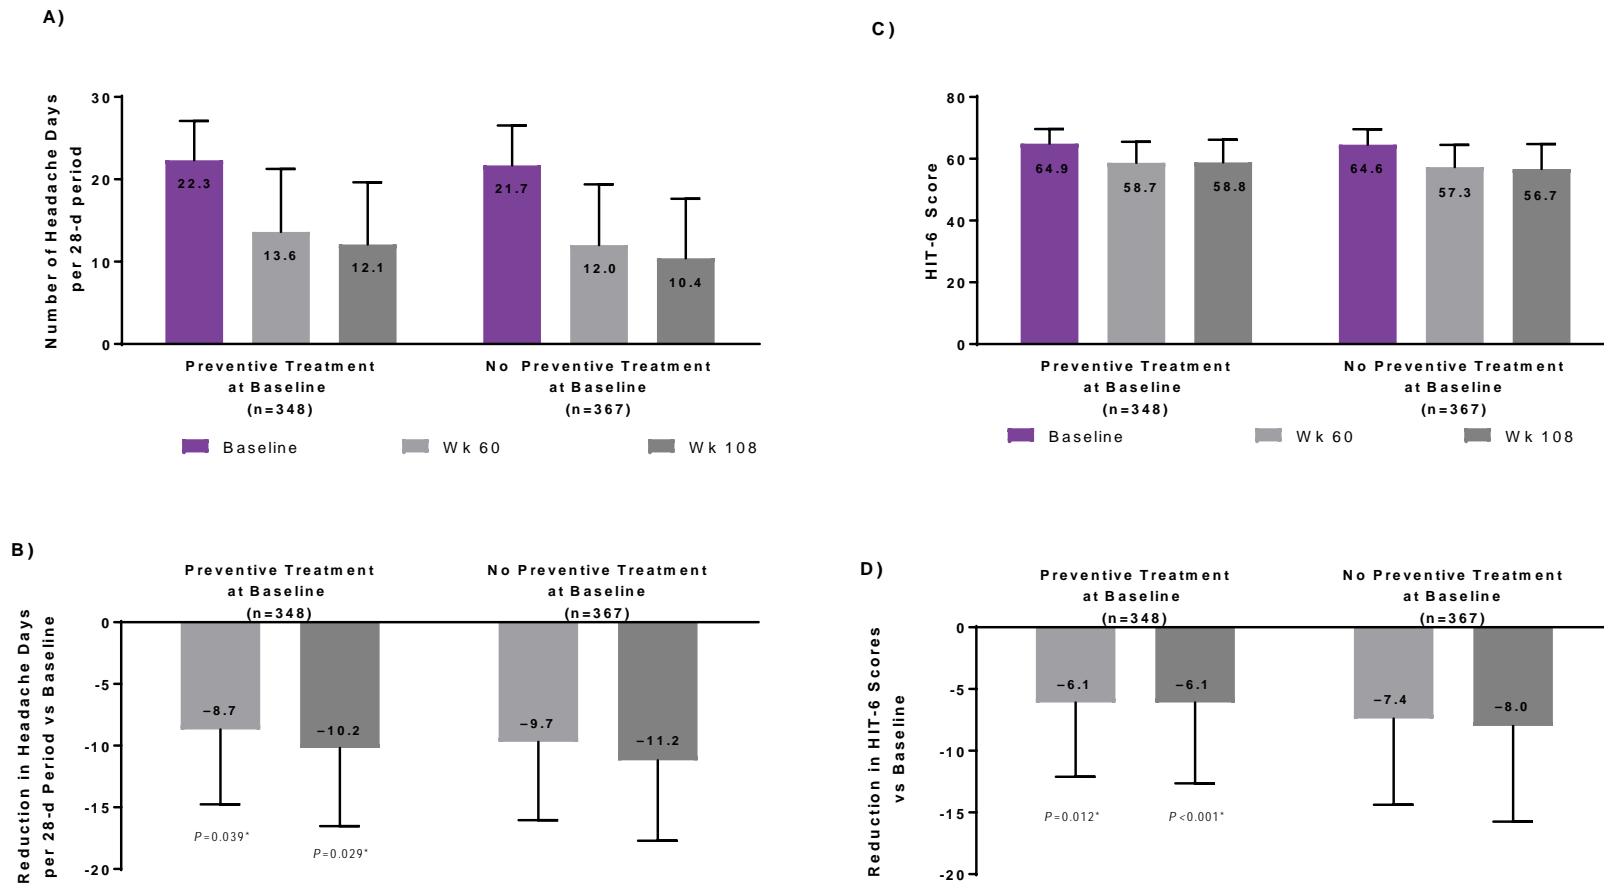

HIT-6=6-item Headache Impact Test.

\*2-sided P value for comparing between subgroups is from the 2 independent groups t-tests.

**Figure S8.** Long-term effect of onabotulinumtoxinA on A) number of headache days per 28-d period, B) change in number of headache days vs baseline, C) HIT-6 score, and D) change in HIT-6 score vs baseline, depicting outcomes after 5 (wk 60) and 9 (wk 108) treatments, by previous use of preventive treatment.

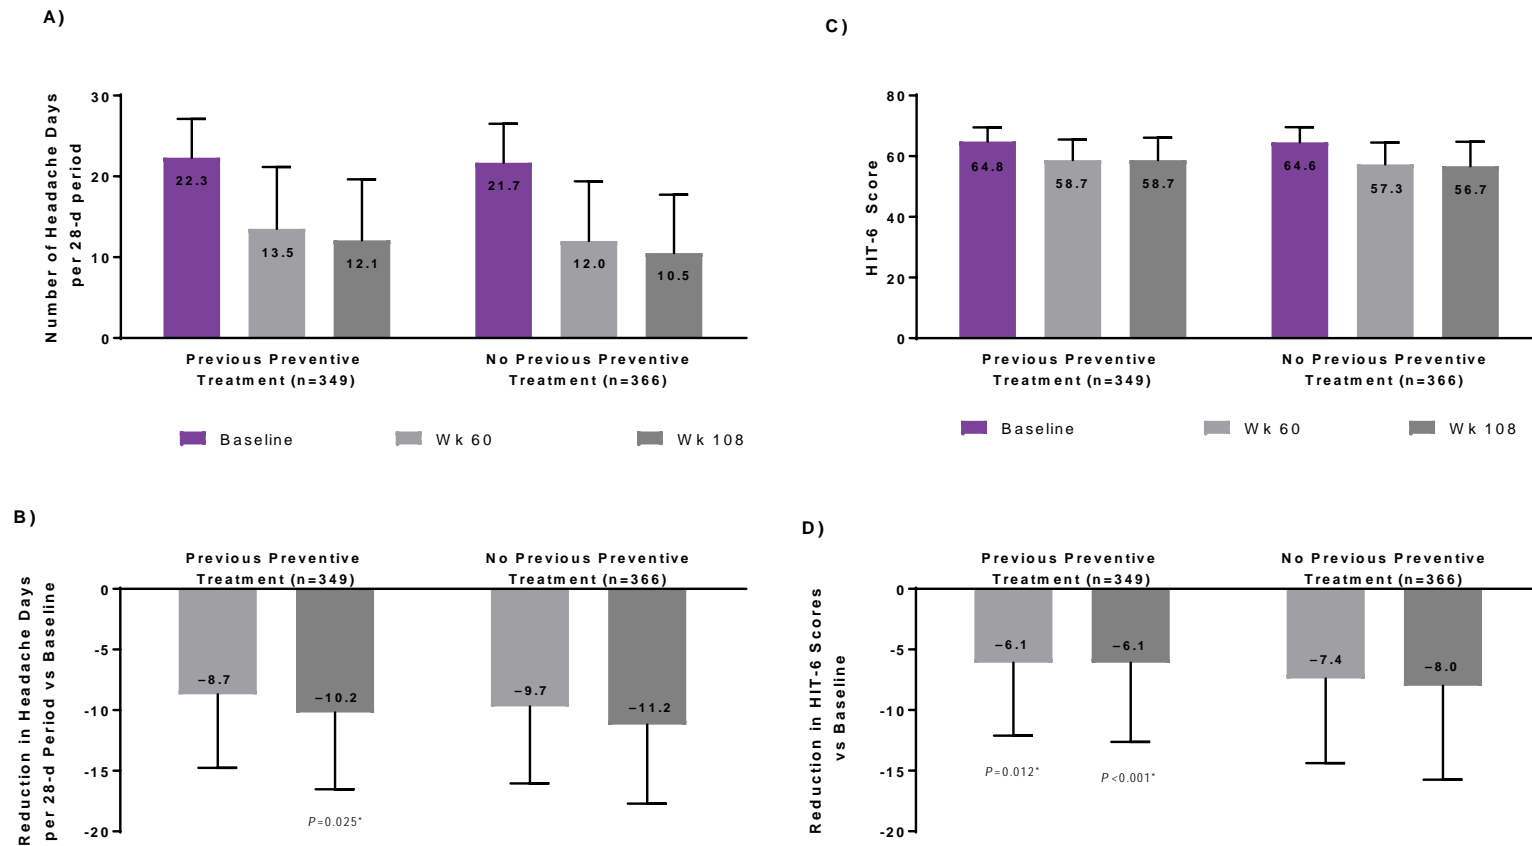

HIT-6=6-item Headache Impact Test.

\*2-sided *P* value for comparing between subgroups is from the 2 independent groups *t*-tests.
